# Supplementary material for: Bioactivity assessment of natural compounds using machine learning models trained on target similarity between drugs
Source: PLoS Comput Biol. 2022 Apr 25;18(4):e1010029. doi: 10.1371/journal.pcbi.1010029 (PMC9071136; doi:10.1371/journal.pcbi.1010029)
Supplement: S2 Table — (XLSX) [file pcbi.1010029.s002.xlsx]

## Sheet: Table S2a
Set	train drugs	train set pairs	test drugs	test set pairs	total pairs	train-set positiveclass	train-set negativeclass	ratio train (positive/negative)	test-set positive class	test-set negative class	ratio test (positive/negative)
set1	1128	635628	282	39621	675249	20283	615345	0.032962	1168	38453	0.0303747
set2	1128	635628	282	39621	675249	19806	615822	0.0321619	1257	38364	0.0327651
set3	1128	635628	282	39621	675249	19412	616216	0.0315019	1359	38262	0.0355183
set4	1128	635628	282	39621	675249	19601	616027	0.0318184	1320	38301	0.0344639
set5	1128	635628	282	39621	675249	20814	614814	0.0338541	1039	38582	0.0269297

## Sheet: Table S2b
	set1-train	freq			set1-test	freq	test/train ratio
1	-	6		1	Alkaloids and derivatives	5	0.147059
2	Alkaloids and derivatives	34		2	Benzenoids	74	0.25256
3	Benzenoids	293		3	Lignans, neolignans and related compounds	1	0.333333
4	Hydrocarbon derivatives	1		4	Lipids and lipid-like molecules	23	0.178295
5	Lignans, neolignans and related compounds	3		5	Nucleosides, nucleotides, and analogues	8	0.470588
6	Lipids and lipid-like molecules	129		6	Organic acids and derivatives	28	0.205882
7	Nucleosides, nucleotides, and analogues	17		7	Organic nitrogen compounds	9	0.243243
8	Organic acids and derivatives	136		8	Organic oxygen compounds	19	0.404255
9	Organic nitrogen compounds	37		9	Organic Polymers	3	0.3
10	Organic oxygen compounds	47		10	Organohalogen compounds	1	0.25
11	Organic Polymers	10		11	Organoheterocyclic compounds	98	0.261333
12	Organohalogen compounds	4		12	Phenylpropanoids and polyketides	13	0.40625
13	Organoheterocyclic compounds	375
14	Organophosphorus compounds	1
15	Organosulfur compounds	3
16	Phenylpropanoids and polyketides	32
	set2-train	freq			set2-test	freq	test/train ratio
1	-	4		1	-	2	0.5
2	Alkaloids and derivatives	32		2	Alkaloids and derivatives	7	0.21875
3	Benzenoids	298		3	Benzenoids	69	0.231544
4	Hydrocarbon derivatives	1		4	Lipids and lipid-like molecules	36	0.310345
5	Lignans, neolignans and related compounds	4		5	Nucleosides, nucleotides, and analogues	4	0.190476
6	Lipids and lipid-like molecules	116		6	Organic acids and derivatives	34	0.261538
7	Nucleosides, nucleotides, and analogues	21		7	Organic nitrogen compounds	10	0.277778
8	Organic acids and derivatives	130		8	Organic oxygen compounds	12	0.222222
9	Organic nitrogen compounds	36		9	Organic Polymers	1	0.0833333
10	Organic oxygen compounds	54		10	Organoheterocyclic compounds	100	0.268097
11	Organic Polymers	12		11	Organosulfur compounds	1	0.5
12	Organohalogen compounds	5		12	Phenylpropanoids and polyketides	6	0.153846
13	Organoheterocyclic compounds	373
14	Organophosphorus compounds	1
15	Organosulfur compounds	2
16	Phenylpropanoids and polyketides	39
	set3-train	freq			set3-test	freq	test/train ratio
1	-	4		1	-	2	0.5
2	Alkaloids and derivatives	30		2	Alkaloids and derivatives	9	0.3
3	Benzenoids	294		3	Benzenoids	73	0.248299
4	Hydrocarbon derivatives	1		4	Lipids and lipid-like molecules	26	0.206349
5	Lignans, neolignans and related compounds	4		5	Nucleosides, nucleotides, and analogues	4	0.190476
6	Lipids and lipid-like molecules	126		6	Organic acids and derivatives	41	0.333333
7	Nucleosides, nucleotides, and analogues	21		7	Organic nitrogen compounds	5	0.121951
8	Organic acids and derivatives	123		8	Organic oxygen compounds	9	0.157895
9	Organic nitrogen compounds	41		9	Organic Polymers	1	0.0833333
10	Organic oxygen compounds	57		10	Organohalogen compounds	2	0.666667
11	Organic Polymers	12		11	Organoheterocyclic compounds	98	0.261333
12	Organohalogen compounds	3		12	Phenylpropanoids and polyketides	12	0.363636
13	Organoheterocyclic compounds	375
14	Organophosphorus compounds	1
15	Organosulfur compounds	3
16	Phenylpropanoids and polyketides	33
	set4-train	freq			set4-test	freq	test/train ratio
1	-	5		1	-	1	0.2
2	Alkaloids and derivatives	32		2	Alkaloids and derivatives	7	0.21875
3	Benzenoids	285		3	Benzenoids	82	0.287719
4	Hydrocarbon derivatives	1		4	Lignans, neolignans and related compounds	1	0.333333
5	Lignans, neolignans and related compounds	3		5	Lipids and lipid-like molecules	34	0.288136
6	Lipids and lipid-like molecules	118		6	Nucleosides, nucleotides, and analogues	6	0.315789
7	Nucleosides, nucleotides, and analogues	19		7	Organic acids and derivatives	31	0.233083
8	Organic acids and derivatives	133		8	Organic nitrogen compounds	8	0.210526
9	Organic nitrogen compounds	38		9	Organic oxygen compounds	14	0.269231
10	Organic oxygen compounds	52		10	Organic Polymers	2	0.181818
11	Organic Polymers	11		11	Organohalogen compounds	3	1.5
12	Organohalogen compounds	2		12	Organoheterocyclic compounds	86	0.222222
13	Organoheterocyclic compounds	387		13	Organosulfur compounds	2	2
14	Organophosphorus compounds	1		14	Phenylpropanoids and polyketides	5	0.125
15	Organosulfur compounds	1
16	Phenylpropanoids and polyketides	40
	set5-train	freq			set5-test	freq	test/train ratio
1	-	6		1	Alkaloids and derivatives	10	0.344828
2	Alkaloids and derivatives	29		2	Benzenoids	82	0.287719
3	Benzenoids	285		3	Hydrocarbon derivatives	1	1
4	Lignans, neolignans and related compounds	1		4	Lignans, neolignans and related compounds	3	3
5	Lipids and lipid-like molecules	122		5	Lipids and lipid-like molecules	30	0.245902
6	Nucleosides, nucleotides, and analogues	21		6	Nucleosides, nucleotides, and analogues	4	0.190476
7	Organic acids and derivatives	133		7	Organic acids and derivatives	31	0.233083
8	Organic nitrogen compounds	34		8	Organic nitrogen compounds	12	0.352941
9	Organic oxygen compounds	54		9	Organic oxygen compounds	12	0.222222
10	Organic Polymers	9		10	Organic Polymers	4	0.444444
11	Organohalogen compounds	5		11	Organoheterocyclic compounds	84	0.215938
12	Organoheterocyclic compounds	389		12	Phenylpropanoids and polyketides	9	0.25
13	Organophosphorus compounds	1
14	Organosulfur compounds	3
15	Phenylpropanoids and polyketides	36

## Sheet: Table S2c
RandomForest performance independent set (20% test set) validation
test set	mcc	f1	tpr	fpr	fnr	tnr	ppv	acc	bac	mmce	kappa	auc
set1	0.31	0.28	0.18	0.004	0.82	0.99	0.57	0.97	0.59	0.03	0.26	0.89
set2	0.33	0.31	0.22	0.006	0.77	0.99	0.53	0.96	0.61	0.03	0.3	0.89
set3	0.38	0.36	0.26	0.006	0.73	0.99	0.6	0.97	0.63	0.03	0.35	0.92
set4	0.39	0.35	0.24	0.004	0.76	0.99	0.66	0.97	0.62	0.03	0.34	0.91
set5	0.36	0.34	0.24	0.004	0.75	0.99	0.58	0.97	0.61	0.02	0.33	0.91
