# Supplementary material for: Bioactivity assessment of natural compounds using machine learning models trained on target similarity between drugs
Source: PLoS Comput Biol. 2022 Apr 25;18(4):e1010029. doi: 10.1371/journal.pcbi.1010029 (PMC9071136; doi:10.1371/journal.pcbi.1010029)
Supplement: S3 Table — (DOCX) [file pcbi.1010029.s003.docx]

**S3 Table** Model performance metrics and their description: TP – true positive, FP – false positive, TN – true negative, FN – false negative, TPR – true positive rate (TP/Positives), TNR – true negative rate (TN/negatives)

| **Performance metric** | **Formula** |
| --- | --- |
| Matthews correlation coefficient (MCC) |  |
| F1 score |  |
| Balanced accuracy (BAC) |  |
| Kappa statistic |  |
| Positive predictive value (PPV) |  |
| Accuracy |  |
| Mean misclassification error (MMCE) | Defined as: mean(response != truth) |
